# Supplementary material for: Fe3Pt intermetallic nanoparticles anchored on N-doped mesoporous carbon for the highly efficient oxygen reduction reaction
Source: Royal Society of Chemistry journal article supplement (doi:10.1039/d0cc00895h), 2020-01-01
Supplement: d0cc00895h1.pdf [file d0cc00895h1.pdf]

**Electronic Supplementary Information (ESI)**

**Fe<sub>3</sub>Pt Intermetallic nanoparticles anchored on N-doped Mesoporous Carbon for Highly  
Efficient Oxygen Reduction Reaction**

Danke Chen, Zhuoyi Li, Yu Zhou, Xu Ma, Hanqing Lin, Wen Ying, Xinsheng Peng\*

State Key Laboratory of Silicon Materials, school of Materials Science and Engineering, Zhejiang  
University, Hangzhou 310027, China.

## Experiment Section

### Chemicals

Zinc nitrate ( $\text{Zn}(\text{NO}_3)_2 \cdot \text{H}_2\text{O}$ ), ferric nitrate ( $\text{Fe}(\text{NO}_3)_3 \cdot 6\text{H}_2\text{O}$ ), ethanol ( $\text{CH}_3\text{CH}_2\text{OH}$ ) and isopropanol ( $((\text{CH}_3)_2\text{CHOH})$ ) were purchased from Sinopharm Chemical Reagent Co., Ltd. 2-aminoethanol ( $\text{NH}_2\text{-CH}_2\text{CH}_2\text{OH}$ ) and Nafion solution (5 wt %) were obtained from Sigma-Aldrich. 2-methylimidazole (2-mIm), potassium chloroplatinate ( $\text{K}_2[\text{PtCl}_4]$ ) and potassium hydroxide (KOH) were purchased from Aladdin. Commercial Pt/C (20wt%) catalyst was purchased from Johnson Matthey. All chemicals were used as received without further purification.

### Synthesis of $\text{Fe}_3\text{Pt/N@C}$

For the synthesis of Pt-Fe@ZIF-8, Pt-Fe co-functionalized zinc hydroxide nanotrans (ZHNs) were initially prepared. Generally, 4 mM  $\text{Zn}(\text{NO}_3)_2$  and 0.04 mM  $\text{Fe}(\text{NO}_3)_3$  aqueous solution were mixed with 1.6 mM aminoethanol aqueous solution under stirring, with further aging at room temperature for 30 min to form Fe doped ZHNs.<sup>1</sup> Subsequently, 0.0133 mM  $\text{K}_2[\text{PtCl}_4]$  aqueous solution was added to the as-prepared Fe doped ZHNs dropwise under vigorous stirring, forming a homogeneous suspension. Then the resultant Pt-Fe co-functionalized ZHNs were collected through filtration and further immersed in 25 mM 2-mIm ethanol-water (Volume ratio, 2:3) solution for 24 hrs. After that, Pt-Fe@ZIF-8 was obtained by filtering and washing by water and ethanol several times. Finally, the sample was transferred into a quartz tube and heated to 900 °C kept for 30 min at a heating rate of 2 °C/min in flowing nitrogen atmosphere. The obtained material was directly used as electrocatalyst without further treatment. As a contrast, the Pt/N@C catalyst was prepared with the same procedure except without adding Fe precursor, while the

Fe/N@C catalyst was similarly prepared without adding Pt precursor. Furthermore, catalysts with different proportions of Fe-Pt were also prepared by regulating the concentration of  $\text{Fe}(\text{NO}_3)_3$  used in the preparation of MOF precursors.

### **Material characterization**

The morphologies, structures and elemental analyses were characterized by scanning electronic microscopy (SEM, S-4800, Hitachi), transmission electron microscope (TEM, HT-7700, Hitachi; JEM 2100F, JEOL), Raman spectroscopy (LabRAM HR Evolution, Horiba Jobin Yvon) and X-ray diffraction (XRD) (XRD-7000, Shimadzu) with  $\text{Cu K}\alpha$  radiation. The specific surface area and pore size distribution of all the catalysts were determined by recording  $\text{N}_2$  adsorption-desorption isotherms at 77 K applying the Brunauer-Emmett-Teller (BET) method with a Micromeritics specific area analyzer (Micromeritics, 3Flex, SN#340). The samples were also analyzed by X-ray photoelectron spectroscopy (XPS) (AXIS Supra, Kratos Analytical) using monochromatic  $\text{Al K}\alpha$  radiation. The binding energy was calibrated by means of the C 1s peak energy of 284.6 eV.

### **Electrocatalytic ORR activity measurements**

The electrocatalytic ORR activity measurements were performed in a conventional three-electrode cell at room temperature on the CHI 760E electrochemical analyzer using WaveDriver 20 bipotentiostat (Pine Instrument Company, USA). A Hg/HgO reference electrode was employed as reference electrode. All potentials initially measured versus the Hg/HgO reference electrode were converted to Reversible Hydrogen Electrode (RHE) reference scale as follows:  $E_{(\text{RHE})} = E_{(\text{Hg}/\text{HgO})} + 0.059 \cdot \text{pH} + 0.098$ . A graphite rod was used as the counter electrode. A glassy carbon disk (5 mm in diameter) and a glassy carbon disk (5.5 mm in diameter) with a Pt ring (6.5 mm in inner diameter and 8.5 mm in outer diameter) were used as the working electrode in rotating disk

electrode (RDE) and rotating ring-disk electrode (RRDE) experiments, respectively. The catalyst ink was prepared by ultrasonically dispersing 4 mg of catalyst in 1 mL isopropanol-water solution (Volume ratio, 4:1) containing 16  $\mu\text{L}$  of 5 wt% Nafion solution to form a uniform suspension. 10  $\mu\text{L}$  ink of catalysts was dropped onto the 0.196-cm<sup>2</sup> glassy carbon disk before the RDE experiments, resulting in the catalyst loading of 0.2 mg cm<sup>-2</sup>.

Cyclic voltammetry (CV) tests were carried out in N<sub>2</sub>- or O<sub>2</sub>-saturated 0.1 M KOH electrolyte with a scan rate of 50 mV s<sup>-1</sup> and the potential range was between 0 and 1.2 V vs. RHE. The linear sweeping voltammetry (LSV) measurements were performed at different rotation speeds (from 400 to 2500 rpm) with a scan rate of 10 mV s<sup>-1</sup>. The cyclic stability of catalysts was evaluated using accelerated stress tests (ASTs) by cycling the potential from 0.6 to 1.0 V vs. RHE in O<sub>2</sub>-saturated 0.1 M KOH with a rotation speed of 1600 rpm. The methanol tolerance ability was evaluated by chronoamperometry at 0.60 V vs. RHE with a rotation speed of 1600 rpm before and after adding 50 mL methanol into 150 mL O<sub>2</sub>-saturated 0.1 M KOH solution.

The apparent electron transfer number was calculated from the Koutecky-Levich plots on the basis of Koutecky-Levich equation as follows:

$$\frac{1}{j} = \frac{1}{j_L} + \frac{1}{j_K} = \frac{1}{B\omega^{1/2}} + \frac{1}{j_K} \quad (1)$$

$$B = 0.2nF C_0 D_0^{2/3} \nu^{-1/6} \quad (2)$$

where  $j$ ,  $j_K$  and  $j_L$  are the measured, the kinetic and limiting current densities, respectively,  $\omega$  is the electrode rotation rate,  $n$  is the electron transfer number,  $F$  is the Faraday constant (96485 C mol<sup>-1</sup>),  $C_0$  is the bulk concentration of O<sub>2</sub> in 0.1 M KOH ( $1.2 \times 10^{-3}$  mol L<sup>-1</sup>),  $D_0$  is the diffusion coefficient of O<sub>2</sub> in 0.1 M KOH ( $1.9 \times 10^{-5}$  cm<sup>2</sup> s<sup>-1</sup>), and  $\nu$  is the kinematic viscosity of the electrolyte (0.01 cm<sup>2</sup> s<sup>-1</sup>).

The reaction order of dissolved oxygen was further calculated by plotting  $\log(j)$  versus  $\log(1-j/j_L)$  at various rotating rates as the following equation<sup>2</sup>:

$$\log j = \log j_k + m \log(1 - \frac{j}{j_L})$$

Where  $j_k$  was the kinetic current density,  $m$  was the reaction orders with respected to the dissolved oxygen. For the equation can be only employed for the reaction under kinetic-diffusion mixed control region, the corresponding plot at 0.7 V vs. RHE is chosen to show in Fig.S11b.

RRDE tests were conducted on the CHI 760E electrochemical analyzer at a rotation speed of 1600 rpm with a potential sweep of 10 mV s<sup>-1</sup>; the Pt ring potential was set at 1.5 V vs. RHE. The electron transfer number ( $n$ ) and the yield of hydrogen peroxide were obtained based on the following equation:

$$n = 4 \frac{I_d}{I_d + I_r/N} \quad (3)$$

$$\text{H}_2\text{O}_2\% = 200 \frac{I_r/N}{I_d + I_r/N} \quad (4)$$

where  $I_d$  and  $I_r$  are the disk current and ring current, respectively, and  $N$  is the collection efficiency of the Pt ring ( $N = 0.37$ , as provided by the manufacturer).

## References

- [1] X. Peng, J. Jin, N. Kobayashi, W. Schmitt, I. Ichinose, *Chem. Commun.*, 2008, 16, 1904-1906.
- [2] Chia-Chin Chang, Ten-Chin Wen, Hsien-Ju Tien, *Electrochim. Acta*, 1997, 42, 557-565.

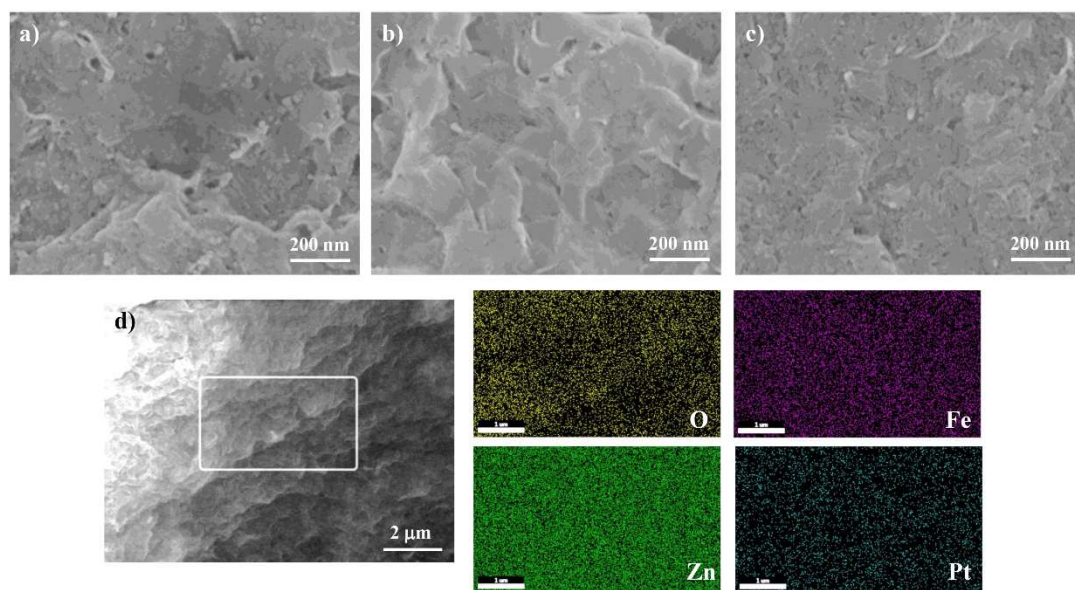

**Fig. S1.** SEM image of (a) Pt-Fe@ZHNs, (b) Pt@ZHNs, (c) Fe@ZHNs, (d) SEM image of Pt-Fe@ZHNs and the corresponding elemental mappings of the white square region marked in (d).

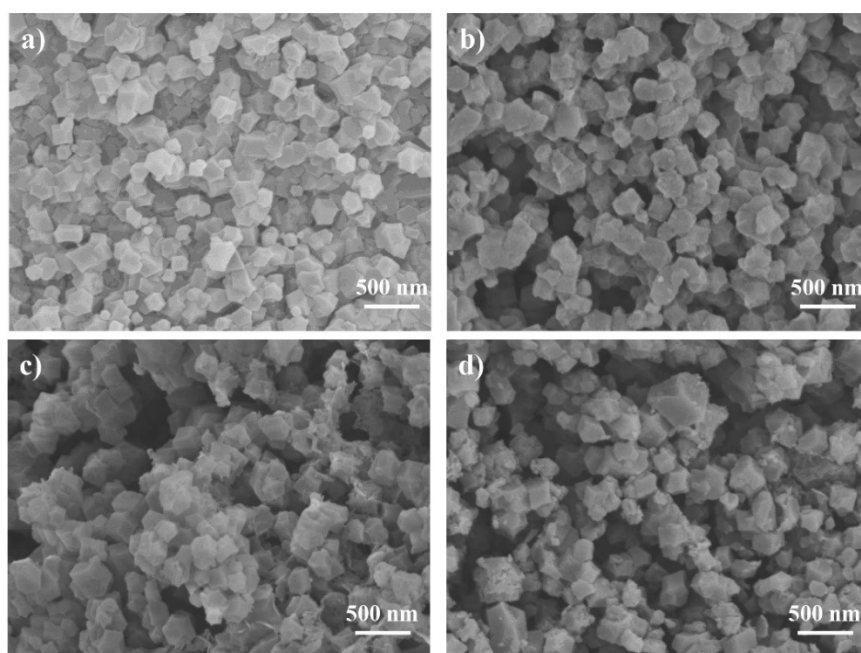

**Fig. S2.** SEM image of (a) ZIF-8, (b) Pt-Fe@ZIF-8, (c) Pt@ZIF-8, (d) Fe@ZIF-8.

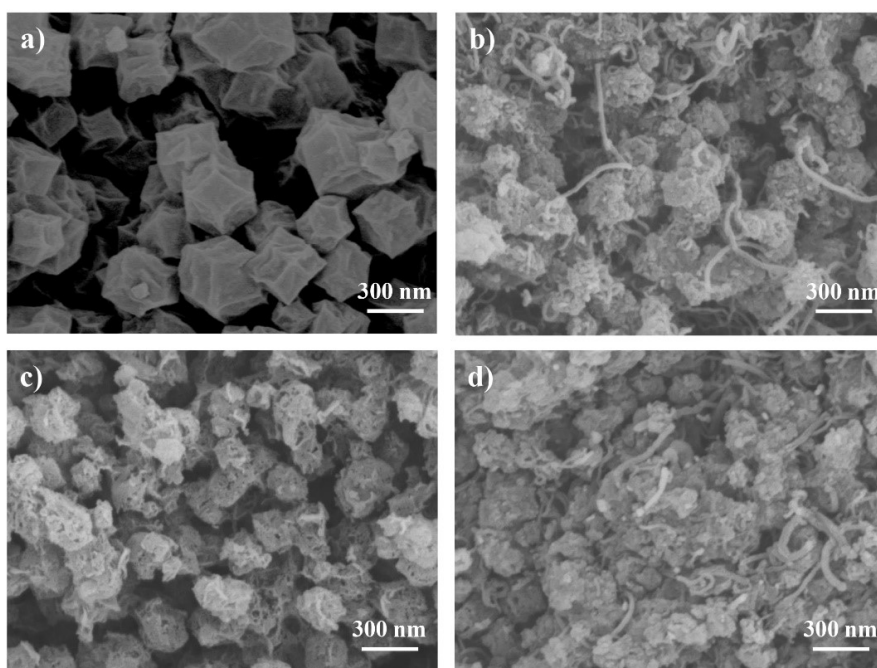

**Fig. S3.** SEM image of (a) N@C, (b) Fe<sub>3</sub>Pt/N@C, (c) Pt/N@C, (d) Fe/N@C.

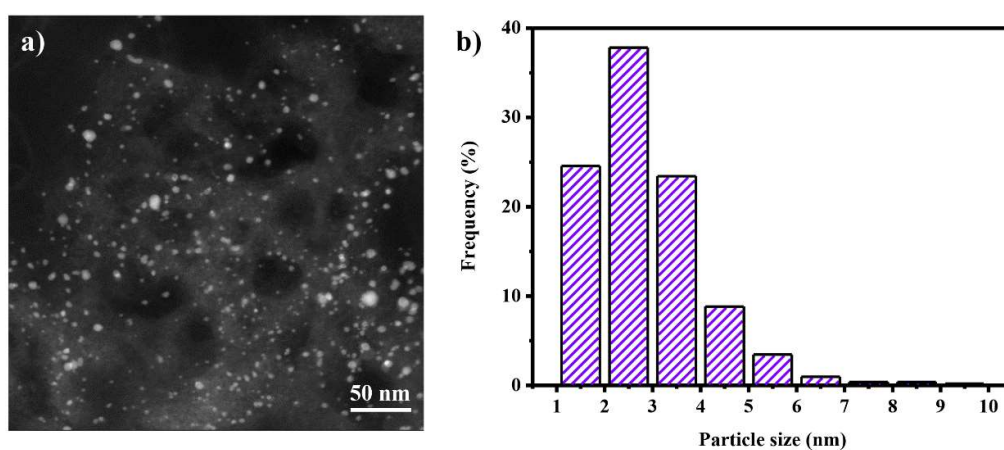

**Fig. S4.** (a) STEM image of Fe<sub>3</sub>Pt/N@C, (b) Particle size distribution measured by STEM of more than 500 particles for Fe<sub>3</sub>Pt/N@C.

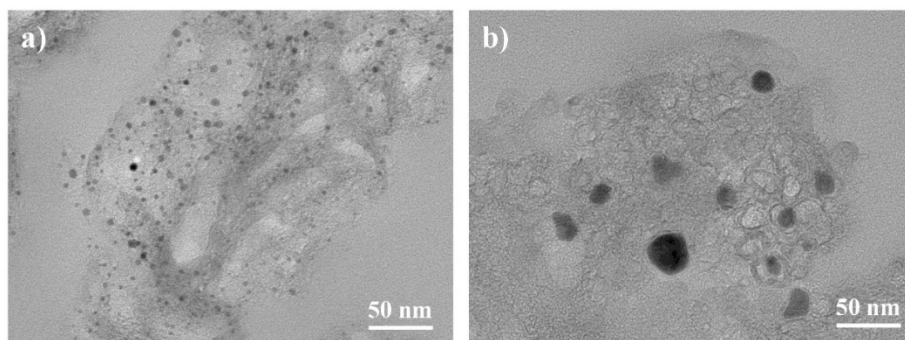

**Fig. S5.** TEM image of (a) Pt/N@C, (b) Fe/N@C.

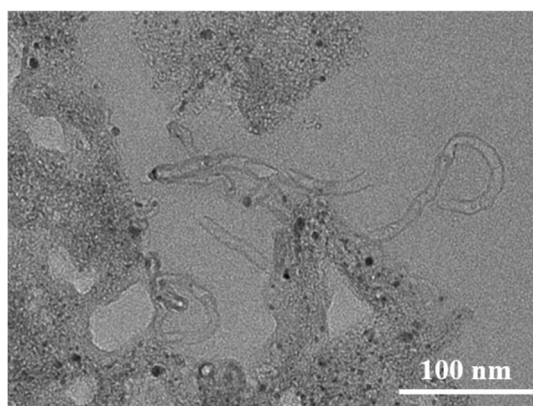

**Fig. S6.** TEM image of Fe<sub>3</sub>Pt/N@C.

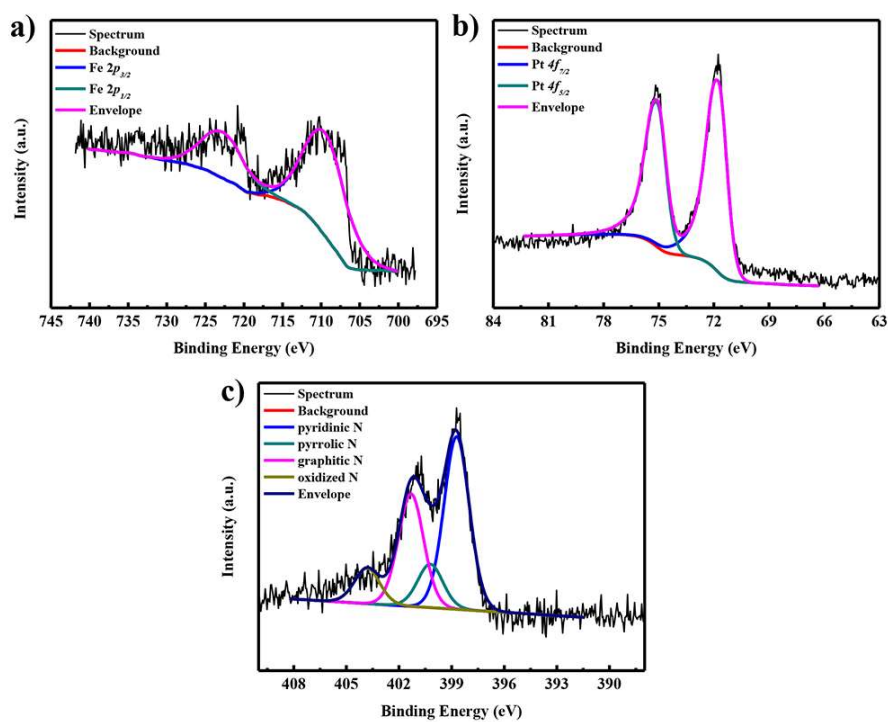

**Fig. S7.** The deconvoluted high resolution XPS scan of (a) Fe 2p; (b) Pt 4f; (c) N 1s of Fe<sub>3</sub>Pt/N@C.



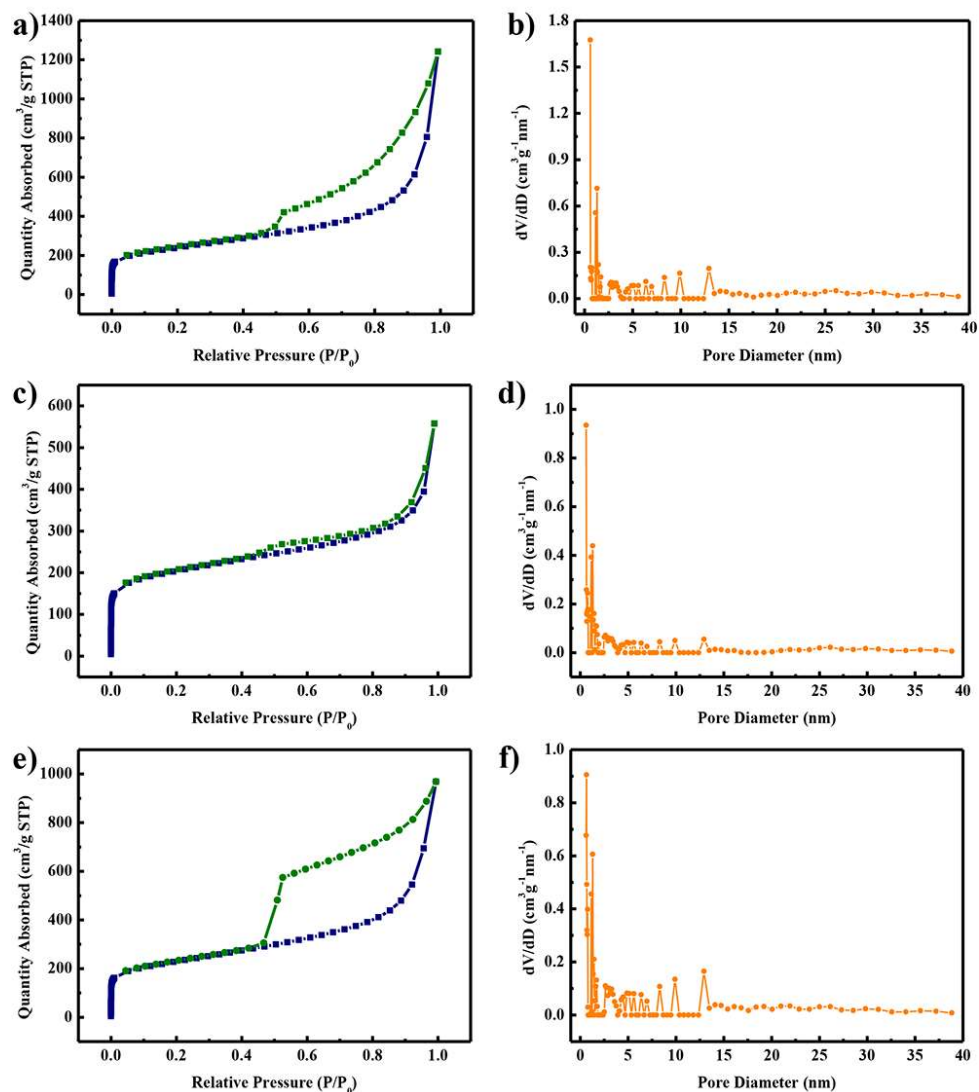

**Fig. S8.** Nitrogen adsorption–desorption isotherms of (a)  $\text{Fe}_3\text{Pt/N@C}$ , (c)  $\text{Fe/N@C}$ , (e)  $\text{Pt/N@C}$ ; the corresponding DFT pore size distributions of (b)  $\text{Fe}_3\text{Pt/N@C}$ , (d)  $\text{Fe/N@C}$ , (f)  $\text{Pt/N@C}$ .

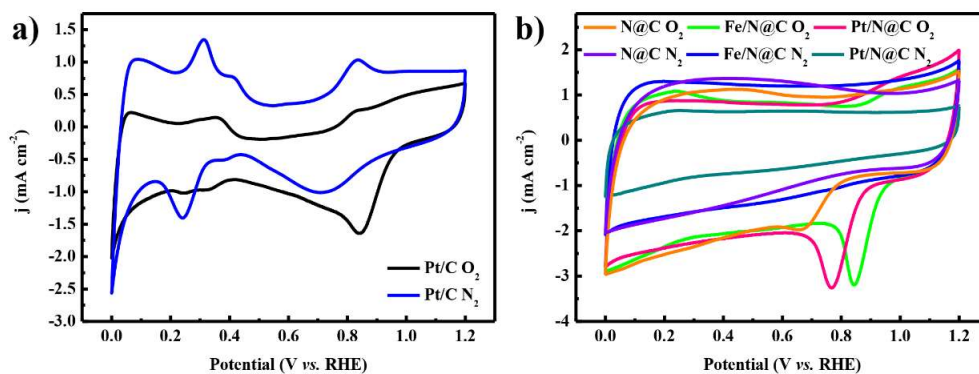

**Fig. S9.** CV curves of (a) commercial Pt/C, (b)  $\text{Fe/N@C}$ ,  $\text{Pt/N@C}$  and  $\text{N@C}$  catalysts in  $\text{O}_2$ - or  $\text{N}_2$ - saturated 0.1 M KOH.

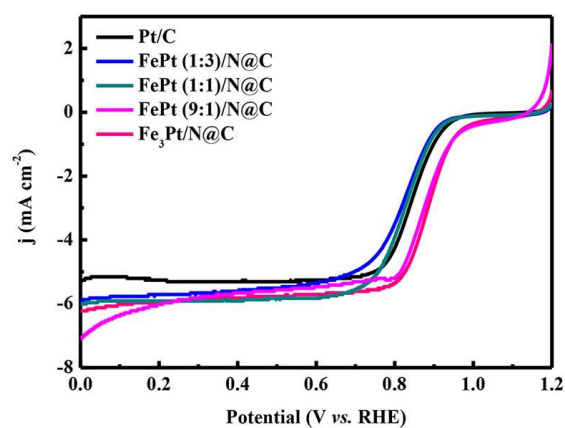

**Fig. S10.** LSV curves of catalysts of different compositions recorded in  $\text{O}_2$ -saturated 0.1 M KOH with a rotation rate of 1600 rpm.

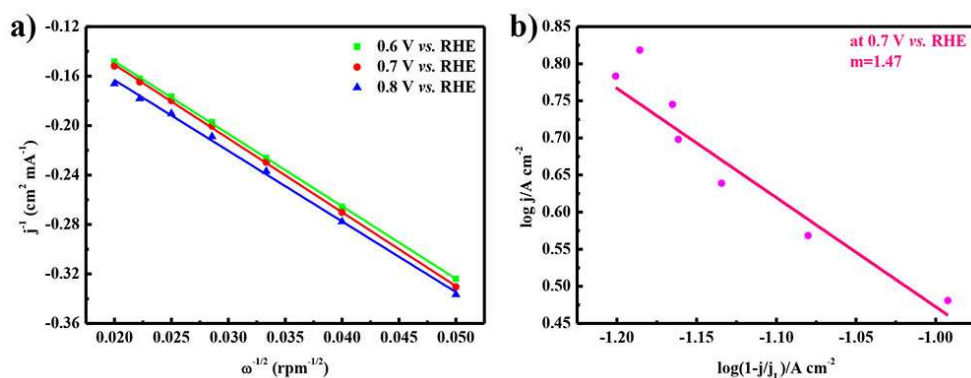

**Fig. S11.** (a) Koutecky-Levich plots of  $\text{Fe}_3\text{Pt}/\text{N}@\text{C}$  catalyst at different potentials; (b) Reaction order plot at 0.7 V vs. RHE for the  $\text{O}_2$  reduction.

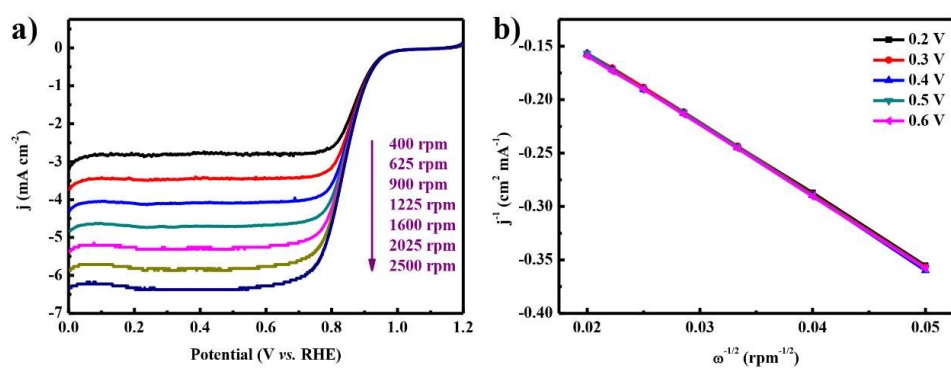

**Fig. S12.** (a) LSV curves of commercial Pt/C at different rotation rates of 400, 625, 900, 1225, 1600, and 2025 rpm; (b) the corresponding Koutecky-Levich plots at different potentials.

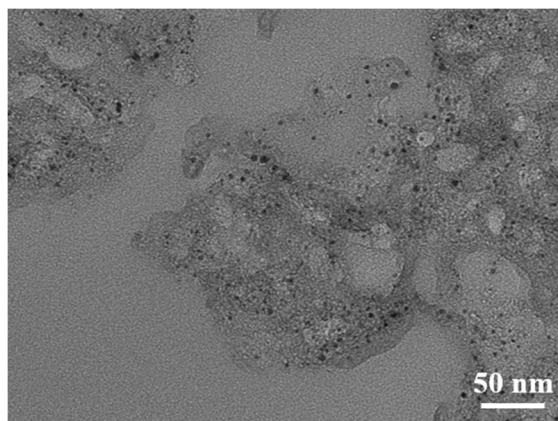

**Fig. S13.** TEM image of  $\text{Fe}_3\text{Pt/N@C}$  after 5000 CV cycles.

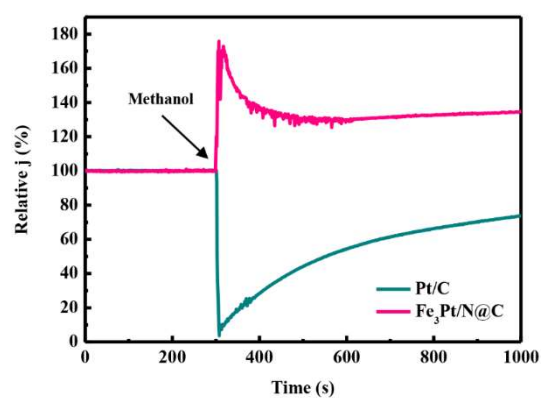

**Fig. S14.** Chronoamperometric response of the Pt/C and  $\text{Fe}_3\text{Pt/N@C}$  catalysts at 0.53 V in  $\text{O}_2$  saturated 0.1 M KOH solution with the addition of 50 mL of methanol.

Table S1. A survey of the catalytic performances of various ORR electrocatalysts from recent literatures in alkaline solution.

| No.       | Catalysts                                | $E_{1/2}$    | $\Delta E_{1/2}^*$ | Ref.                                                     |
|-----------|------------------------------------------|--------------|--------------------|----------------------------------------------------------|
| 1         | Pt-Ni@PC900                              | 0.909        | 9                  | <i>ACS Omega</i> , 2020, 5, 2123-2132                    |
| 2         | FeNi/N-CPCF-950                          | 0.864        | 16                 | <i>Appl. Catal. B: Environ.</i> , 2020, 263, 118344      |
| 3         | Fe <sub>7</sub> C <sub>3</sub> /NG-800   | 0.85         | 10                 | <i>J. Colloid Interf. Sci.</i> , 2019, 556, 352-359      |
| 4         | N-CNTs/ E-NNPs                           | 0.86         | -                  | <i>ChemCatChem</i> , 2019, 11, 4818-4821                 |
| 5         | Fe <sub>1.6</sub> -N-HCNS/rGO-900        | 0.872        | 12                 | <i>ACS Nano</i> , 2018, 12, 5674-5683                    |
| 6         | Fe-ISA/SNC                               | 0.896        | 55                 | <i>Adv. Mater.</i> , 2018, 30, 1800588                   |
| 7         | CoN <sub>x</sub> /HCN-CNTs               | 0.92         | 20                 | <i>Appl. Surf. Sci.</i> , 2020, 504, 144380              |
| 8         | Fe-NHPC-8                                | 0.85         | 20                 | <i>J. Power Sources</i> , 2020, 448, 227443              |
| 9         | G1000-ZC-2.0                             | 0.885        | 30                 | <i>Carbon</i> , 2020, 156, 179e186182                    |
| 10        | Fe-N/C network                           | 0.848        | 15                 | <i>Small Methods</i> , 2017, 1, 1700167                  |
| 11        | SA-Fe/NG                                 | 0.88         | 30                 | <i>PNAS</i> , 2018, 115, 6626                            |
| 12        | NS/C-950                                 | 0.85         | -10                | <i>Electrochim. Acta</i> , 2019, 318, 272e280276         |
| 13        | FeNGC-T                                  | 0.88         | 40                 | <i>J. Mater. Chem. A</i> , 2019,7, 20132-20138           |
| 14        | Fe <sub>2</sub> C/CNFs                   | 0.87         | 20                 | <i>Nanotechnology</i> , 2019, 30, 325403                 |
| 15        | Fe-N/GPC800                              | 0.86         | 30                 | <i>ACS Appl. Mater. Interfaces</i> 2019, 11, 27823-27832 |
| 16        | GL-Fe/Fe <sub>5</sub> C <sub>2</sub> /NG | 0.86         | 20                 | <i>Adv. Energy Mater.</i> 2018, 8, 1702476               |
| 17        | FeNC-900                                 | 0.837        | 10                 | <i>Nanoscale</i> , 2019, 11, 19506-19511                 |
| 18        | Fe/Fe <sub>3</sub> C-NMC                 | 0.88         | 20                 | <i>Electrochim. Acta</i> , 2019, 313, 255-260            |
| 19        | NiCo/NC                                  | 0.84         | -                  | <i>Carbon</i> , 2019, 155, 545e552                       |
| <b>20</b> | <b>Fe<sub>3</sub>Pt/N@C</b>              | <b>0.884</b> | <b>46</b>          | <b>this work</b>                                         |

\*:  $\Delta E_{1/2} = E_{1/2}(\text{catalysts}) - E_{1/2}(\text{commercial Pt/C})$
